# Supplementary material for: Unveiling the hybridization between the Cr-impurity-mediated flat band and the Rashba-split state of the α-Au/Si(111) surface
Source: Royal Society of Chemistry journal article supplement (doi:10.1039/d2nr02757g), 2022-01-01
Supplement: d2nr02757g1.pdf [file d2nr02757g1.pdf]

## Electronic Supplementary Information: Unveiling hybridization between the Cr-impurity-mediated flat band and the Rashba-split state of $\alpha$ -Au/Si(111) surface

A.N. Mihalyuk,<sup>1,2,\*</sup> L.V. Bondarenko,<sup>2</sup> A.Y. Tupchaya,<sup>2</sup> T.V. Utas,<sup>2</sup>

J.P. Chou,<sup>3</sup> D.V. Gruznev,<sup>2</sup> S.V. Ereemeev,<sup>4</sup> A.V. Zotov,<sup>2</sup> and A.A. Saranin<sup>2</sup>

<sup>1</sup>*Institute of High Technologies and Advanced Materials,*

*Far Eastern Federal University, 690950 Vladivostok, Russia*

<sup>2</sup>*Institute of Automation and Control Processes FEB RAS, 690041 Vladivostok, Russia*

<sup>3</sup>*Department of Physics, National Changhua University of Education No.1,*

*Jinde Rd., Changhua City, Changhua County 50007, Taiwan*

<sup>4</sup>*Institute of Strength Physics and Materials Science, Tomsk 634055, Russia*

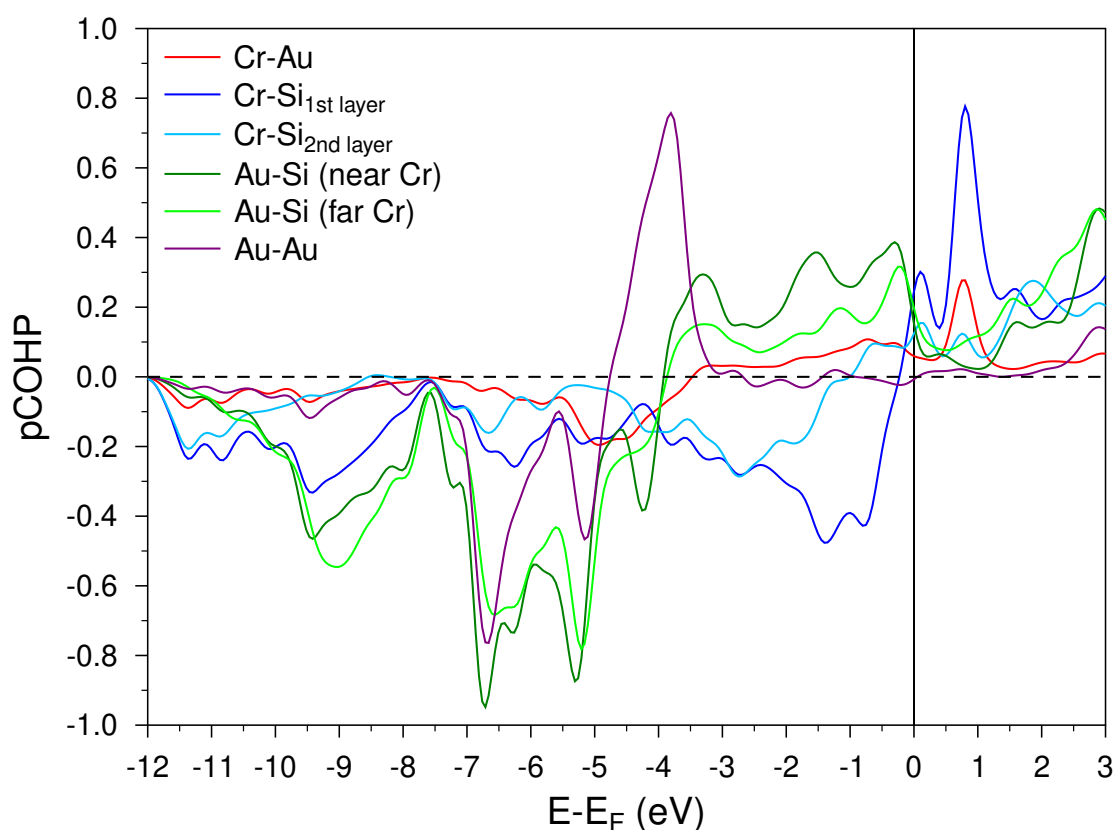

FIG. S1. Projected crystal orbital Hamilton populations (pCOHPs) for the nearest-neighbor Cr–Au, Cr–Si, Au–Au, and Au–Si bonds in the vicinity of the Cr impurity and far from it in the Cr-doped  $\alpha$ -Au/Si(111)- $\sqrt{21} \times \sqrt{21}$ . Positive(negative) pCOHP displays antibonding(bonding) regions.

\* mih-alexey@yandex.ru
